# Supplementary material for: Novel Insights into Exogenous Phytohormones: Central Regulators in the Modulation of Physiological, Biochemical, and Molecular Responses in Rice under Metal(loid) Stress
Source: MDPI journal article supplement (doi:10.3390/metabo13101036), 2023-09-26
Supplement: s1 [file s1]

**Table S1. List of Abbreviations**

| <b>Abbreviation</b>           | <b>Term</b>                                     |
|-------------------------------|-------------------------------------------------|
| ABA                           | Abscisic Acid                                   |
| NCED                          | 9-cis-Epoxy-carotenoid Dioxygenase              |
| OsNCED                        | Oryza sativa 9-cis-Epoxy-carotenoid Dioxygenase |
| Cd                            | Cadmium                                         |
| TS                            | Tungstate                                       |
| IAA                           | Indole-3-Acetic Acid (Auxin)                    |
| GUS                           | $\beta$ -Glucuronidase                          |
| BFA                           | Brefeldin A                                     |
| TIBA                          | 2,3,5-Triiodobenzoic Acid                       |
| OsPINs                        | Oryza sativa PIN-FORMED proteins                |
| OsYUCCA                       | Oryza sativa YUCCA                              |
| ARF2                          | Auxin Response Factor 2                         |
| AXR3/IAA17                    | Auxin Response 3/Indole-3-Acetic Acid 17        |
| AXR2/IAA7                     | Auxin Response 2/Indole-3-Acetic Acid 7         |
| CDKC;1                        | Cyclin-Dependent Kinase C-1                     |
| CycD4;1                       | Cyclin D4;1                                     |
| CDKF;4                        | Cyclin-Dependent Kinase F-4                     |
| CycT1;6                       | Cyclin T1;6                                     |
| MAPK                          | Mitogen-Activated Protein Kinase                |
| H <sub>2</sub> O <sub>2</sub> | Hydrogen Peroxide                               |
| O <sub>2</sub> <sup>•−</sup>  | Superoxide Anion Radical                        |
| NO                            | Nitric Oxide                                    |
| ROS                           | Reactive Oxygen Species                         |
| SLs                           | Strigolactones                                  |
| BRs                           | Brassinosteroids                                |
| EBRs                          | 24-Epibrassinolide                              |
| HM                            | Heavy Metal                                     |

|               |                                                                  |
|---------------|------------------------------------------------------------------|
| SA            | Salicylic Acid                                                   |
| Cd            | Cadmium                                                          |
| MDA           | Malondialdehyde                                                  |
| H2O2          | Hydrogen Peroxide                                                |
| AsV           | Arsenate                                                         |
| GA            | Gibberellic Acid                                                 |
| Fe            | Iron                                                             |
| Mn            | Manganese                                                        |
| Ni            | Nickel                                                           |
| CK            | Cytokinin                                                        |
| P5C           | Pyrroline-5-Carboxylate                                          |
| ProDH         | Proline Dehydrogenase                                            |
| P5CS2         | Pyrroline-5-Carboxylate Synthetase 2                             |
| DAO4          | Diamine Oxidase 4                                                |
| OAT           | Ornithine Aminotransferase                                       |
| NO            | Nitric Oxide                                                     |
| OsCKX5        | Oryza sativa Cytokinin Oxidase/Dehydrogenase 5                   |
| OsCKX4        | Oryza sativa Cytokinin Oxidase/Dehydrogenase 4                   |
| OsIPT4        | Oryza sativa Isopentenyltransferase 4                            |
| OsRR20        | Oryza sativa Response Regulator 20                               |
| OsHKL1/OsCRL4 | Oryza sativa Histidine Kinase-like 1 / Cytokinin Receptor-like 4 |
| OsRR1         | Oryza sativa Response Regulator 1                                |
| OsRR13        | Oryza sativa Response Regulator 13                               |
| OsRR14        | Oryza sativa Response Regulator 14                               |
| OsRR16        | Oryza sativa Response Regulator 16                               |
| OsRR111       | Oryza sativa Response Regulator 111                              |
| OsACS2        | Oryza sativa 1-Aminocyclopropane-1-carboxylic Acid Synthase 2    |
| OsACO1        | Oryza sativa 1-Aminocyclopropane-1-carboxylic Acid Oxidase 1     |
| OsACO2        | Oryza sativa 1-Aminocyclopropane-1-carboxylic Acid Oxidase 2     |

|          |                                                              |
|----------|--------------------------------------------------------------|
| OsACO5   | Oryza sativa 1-Aminocyclopropane-1-carboxylic Acid Oxidase 5 |
| OsACO6   | Oryza sativa 1-Aminocyclopropane-1-carboxylic Acid Oxidase 6 |
| ZT3      | Trans-Zeatin                                                 |
| NPK      | Nitrogen, Phosphorous, and Potassium (nutrients)             |
| HMs      | Heavy Metals                                                 |
| Cd       | Cadmium                                                      |
| Pb       | Lead                                                         |
| As       | Arsenic                                                      |
| Zn       | Zinc                                                         |
| OsHMPs   | Oryza sativa Heavy metal-associated proteins                 |
| MAPK     | Mitogen-Activated Protein Kinase                             |
| IAA      | Indole-3-Acetic Acid                                         |
| ARF      | Auxin Response Factor                                        |
| PIN      | Pin-Formed                                                   |
| YUCCA    | YUCCA (auxin biosynthesis gene)                              |
| NAA      | Naphthaleneacetic Acid                                       |
| L-TRP    | L-Tryptophan                                                 |
| IBA      | Indole-3-Butyric Acid                                        |
| Hg       | Mercury                                                      |
| CAT      | Catalase                                                     |
| SOD      | Superoxide Dismutase                                         |
| Cr       | Chromium                                                     |
| OsAUX1   | Oryza sativa AUX1 (auxin transporter)                        |
| OzYUCCA1 | Oryza sativa YUCCA1 (auxin biosynthesis)                     |
| OsASA2   | Oryza sativa ASAT2 (Amino acid synthesis)                    |
| CdSO4    | Cadmium Sulfate                                              |
| Na2HAsO4 | Sodium Arsenate                                              |
| OsIAA    | Oryza sativa Indole-3-Acetic Acid                            |
| V        | Vanadium                                                     |

|                               |                                                   |
|-------------------------------|---------------------------------------------------|
| OsMYB-R1                      | Oryza sativa MYB-RELATED 1                        |
| YUC                           | YUCCA (auxin biosynthesis gene)                   |
| TAA1                          | Tryptophan Aminotransferase of Arabidopsis 1      |
| WOX11                         | WUSCHEL-RELATED HOMEBOX 11                        |
| OsNCED                        | Oryza sativa NINE-CIS-EPOXYCAROTENOID DIOXYGENASE |
| CuSO <sub>4</sub>             | Copper Sulfate                                    |
| CdCl <sub>2</sub>             | Cadmium Chloride                                  |
| ROS                           | Reactive Oxygen Species                           |
| g                             | Gram                                              |
| m <sup>3</sup>                | Cubic Meter                                       |
| H <sub>2</sub> O <sub>2</sub> | Hydrogen Peroxide                                 |
| μM                            | Micromolar                                        |
| OsSMP1                        | Oryza sativa SULFUR MOBILIZATION PROTEIN 1        |
| Ni                            | Nickel                                            |
| mM                            | Millimolar                                        |
| mg                            | Milligram                                         |
| DWARF gene                    | Gene associated with plant growth regulation      |
| OsABCC1                       | Oryza sativa ATP-Binding Cassette C1              |
| OsPCS1                        | Oryza sativa Phytochelatins Synthase 1            |
| OsGSH2                        | Oryza sativa Glutathione Synthetase 2             |
| Gr24                          | Strigolactone GR24                                |
| SLs                           | Strigolactones                                    |
| JAs                           | Jasmonates                                        |
| ABCG                          | ATP-Binding Cassette G (transport proteins)       |
| HMAs                          | Heavy Metal ATPases                               |
| PCS1                          | Phytochelatins Synthase 1                         |
| MDA                           | Malondialdehyde                                   |
| H <sub>2</sub> O <sub>2</sub> | Hydrogen Peroxide                                 |
| MG                            | Methylglyoxal                                     |

|           |                                                                 |
|-----------|-----------------------------------------------------------------|
| MeJA      | Methyl Jasmonate                                                |
| Se+4      | Selenium                                                        |
| OsSBP1    | Oryza sativa Squamosa Promoter Binding Protein 1                |
| OsNIP2;1  | Oryza sativa NOD26-like intrinsic protein 2;1                   |
| OsPT2     | Oryza sativa Phosphate Transporter 2                            |
| Al        | Aluminium                                                       |
| OsCOI     | Oryza sativa Coronatine Insensitive 1                           |
| OsMYC2    | Oryza sativa MYC2                                               |
| OsJAZ3    | Oryza sativa Jasmonate ZIM-Domain Protein 3                     |
| OsINT5    | Oryza sativa Inositol Transporter 5                             |
| OsLsi6    | Oryza sativa Lsi6                                               |
| OsNIP3;1  | Oryza sativa NOD26-like intrinsic protein 3;1                   |
| OsLsi1;2  | Oryza sativa Lsi1;2                                             |
| OsNIP1;1  | Oryza sativa NOD26-like intrinsic protein 1;1                   |
| OsABCC2   | Oryza sativa ATP-Binding Cassette C2                            |
| OsNRAMP1  | Oryza sativa Natural Resistance-Associated Macrophage Protein 1 |
| OsPCS2    | Oryza sativa Phytochelatin Synthase 2                           |
| Br        | Brassinosteroids                                                |
| BRs       | Brassinosteroids                                                |
| EBRs      | Epibrassinolides                                                |
| APX08     | Ascorbate Peroxidase 08                                         |
| APX02     | Ascorbate Peroxidase 02                                         |
| CATb      | Catalase b                                                      |
| CATa      | Catalase a                                                      |
| SOD-Fe    | Superoxide Dismutase - Iron form                                |
| SOD-Cu-Zn | Superoxide Dismutase - Copper-Zinc form                         |
